# Supplementary material
Source: PubMed Central journal article supplement (PMC7940600)

Supplemental Figure 1

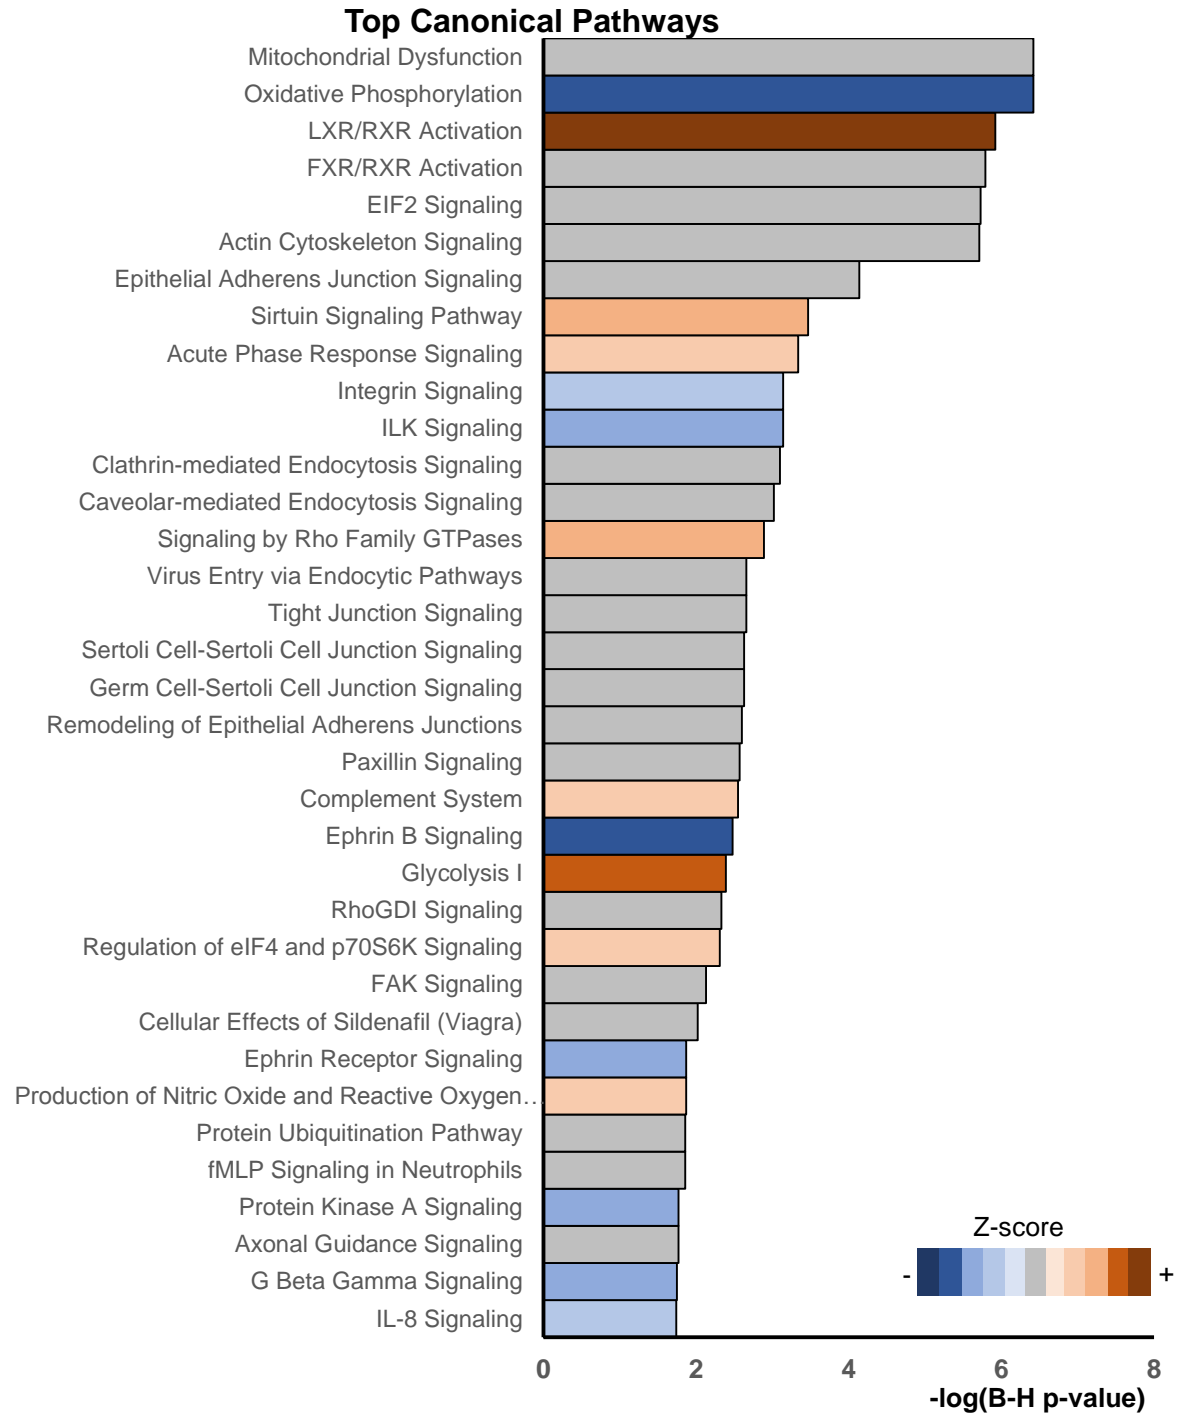

Supplemental Figure 2

### LAA Proteins Differentially Expressed in Persistent vs. Paroxysmal AF Patients in Sinus Rhythm

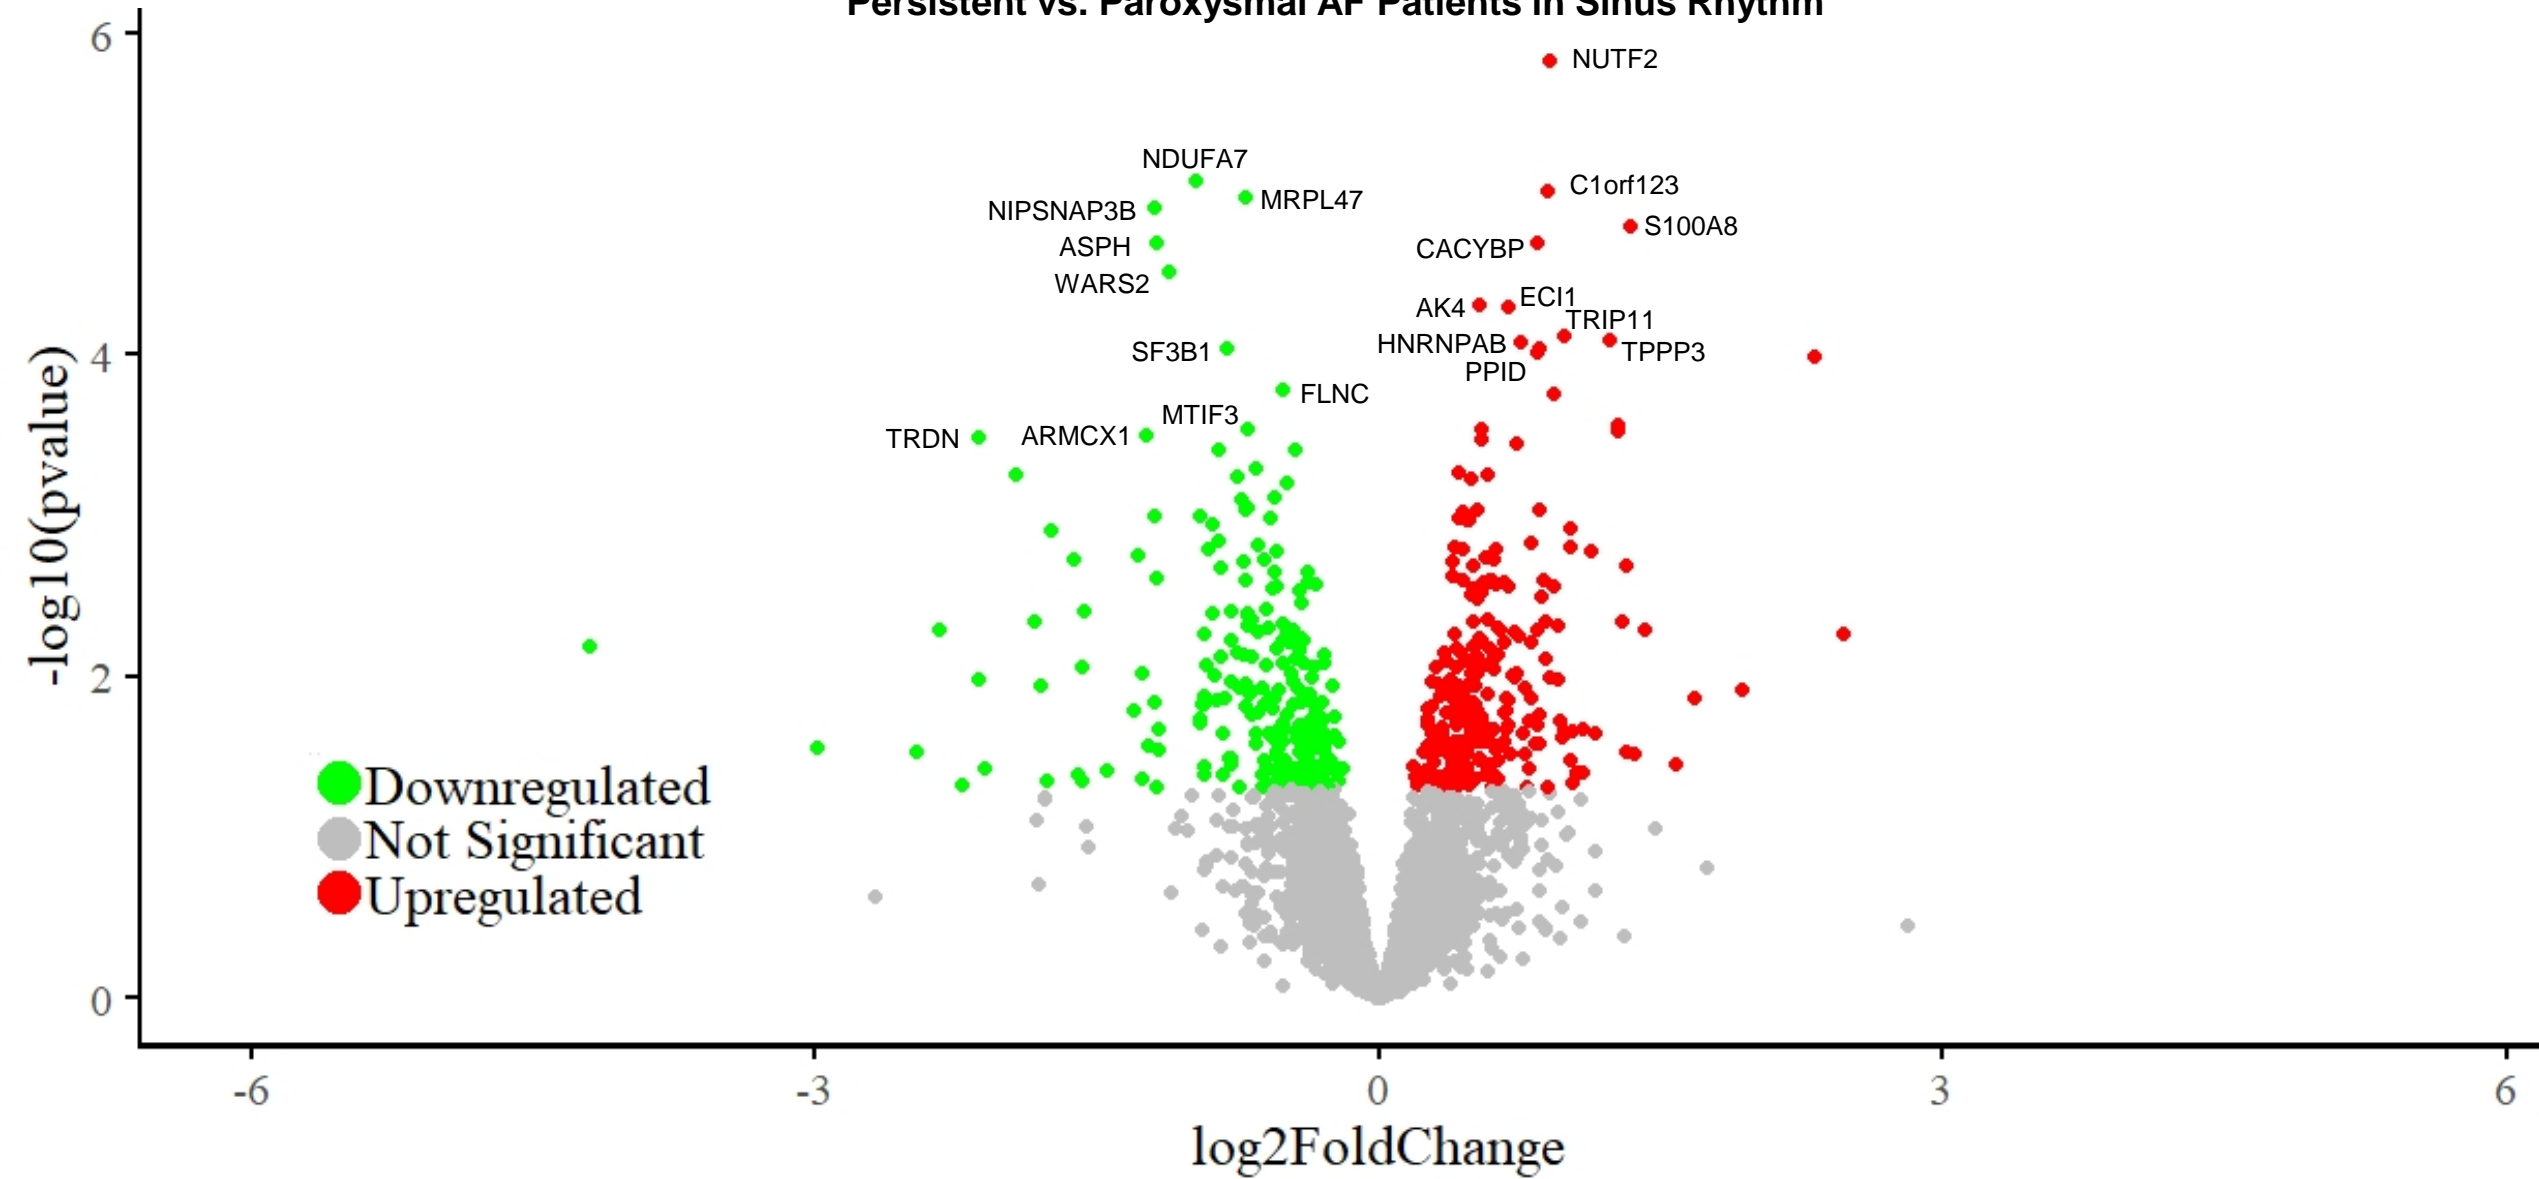

Supplement: NIHMS1668925-supplement-1668925_Sup_Fig_1-2.pdf [file NIHMS1668925-supplement-1668925_Sup_Fig_1-2.pdf]
